## In silico design of ligand triggered RNA switches<sup>☆</sup>

Sven Findeiß<sup>a,b,c,\*</sup>, Stefan Hammer<sup>a,b,c</sup>, Michael T. Wolfinger<sup>c,d</sup>, Felix Kühnl<sup>a</sup>,  
Christoph Flamm<sup>c</sup>, Ivo L. Hofacker<sup>b,c</sup>

<sup>a</sup>*Bioinformatics, Institute of Computer Science, and Interdisciplinary Center for  
Bioinformatics, Leipzig University, Härtelstraße 16–18, 04107 Leipzig, Germany*

<sup>b</sup>*University of Vienna, Faculty of Computer Science, Research Group Bioinformatics and  
Computational Biology, Währingerstraße 29, 1090 Vienna, Austria*

<sup>c</sup>*University of Vienna, Faculty of Chemistry, Department of Theoretical Chemistry,  
Währingerstraße 17, 1090 Vienna, Austria*

<sup>d</sup>*Medical University of Vienna, Center for Anatomy and Cell Biology, Währingerstraße 13,  
1090 Vienna, Austria*

---

### Abstract

This contribution sketches a work flow to design an RNA switch that is able to adapt two structural conformations in a ligand dependent way. A well characterized RNA aptamer, i. e., knowing its  $K_d$  and adaptive structural features, is an essential ingredient of the described design process. We exemplify the principles using the well known theophylline aptamer throughout this work. The aptamer in its ligand-binding competent structure represents one structural conformation of the switch while an alternative fold that disrupts the binding competent structure forms the other conformation. To keep it simple we do not incorporate any regulatory mechanism to control transcription or translation. We elucidate a commonly used design process by explicitly dissecting and explaining the necessary steps in detail. We developed a novel objective function which methodically describes the function of this simple, ligand-triggered riboswitch and describe an extensive *in silico* analysis pipeline to evaluate important kinetic properties of the designed sequences. This protocol and the developed software can be easily extended or adapted to fit novel design scenarios and thus can serve as a template for future needs.

**Keywords:** inverse folding, multi state design, RNA design, riboswitch, objective function, RNA kinetics

---

<sup>☆</sup>Issue title: Methods and Advances in RNA characterization and design

Guest Editors: Lydia M. Contreras

\*Corresponding Author

Email address: [sven@bioinf.uni-leipzig.de](mailto:sven@bioinf.uni-leipzig.de) (Sven Findeiß)

## 1. Introduction

Riboswitches are highly structured RNA sequences commonly found in the 5'-untranslated region (UTR) of prokaryotic messenger RNAs (mRNAs). Within this regulatory domain, they are responsible for altering gene expression on the transcriptional or translational level in response to environmental changes, which is typically the concentration of a small ligand [1]. A riboswitch consists of two components: i) a sensory domain and ii) a regulatory domain. While the former specifically senses the environmental change, the latter is responsible for influencing the expression level of the downstream gene. Beside those switches that follow this commonly assumed two-component model, examples are known where a sensory domain alone, i.e., an aptamer, is able to alter gene expression [2, 3, 4, 5]. The possibility to encode effective sensors at RNA level makes riboswitches valuable gadgets that can directly interfere with the complex process of gene expression without the need of additional co-factors such as proteins. Here we elucidate the complex process of designing such a ligand-sensing riboswitch that, for simplicity, does not implement a specific regulation mechanism at transcriptional or translational level. The RNA sequence should “simply” adapt two alternative conformations depending on the presence or absence of a ligand. Therefore, we aim to extend an aptamer such that an alternative structural conformation is formed in the absence of the ligand.

Successful design approaches show that the problem of generating an artificial RNA sequence exhibiting a prescribed functionality needs to be formulated as a multi-step approach, including computational and experimental, analytic and constructive methods [6, 7]. Early design publications already followed such a multi-step scheme but included manual steps instead of computational methods, as there were just no computational tools available that implemented the features actually needed by the experimentalists. However, this changed over time and recently the common trend is to perform as many steps as possible with the support of advanced *in silico* methods [8].

As a first step, it is important to analyze the underlying biological system, the cellular environment and, most importantly, all the properties of the building blocks to use. With this information, it is then possible to design a model describing the functionality of the novel RNA molecule in its environment. To determine a sequence with the requested characteristics, usually an optimization problem is formalized, where the objectives are specified as constraints and a mathematical function describing various biophysical properties of the system. Obtaining a sequence compatible with constraints such as specific target structures and sequence motifs is a quite tricky task, which was solved with various methods ranging from manual design [9] to graph-theoretical coloring algorithms as implemented in *RNAb Blueprint* [10]. A variety of well-established optimization methods such as the Metropolis–Hastings algorithm [11, 12] or genetic algorithm based approaches were used to find optimal solutions by traversing through the constrained solution space [13, 14]. However, until now, only little effort was made to find proper objective functions. Often only some static properties of the molecule’s energy landscape are used instead of more directly characteriz-

ing the mechanism of the artificial device. Only recently, some published design programs started to allow to compile an objective function from a catalog of predefined functions [15, 14]. *RNAblueprint* [10] went one step further and allowed to formulate the objective utilizing a scripting interface, which gives the user complete control over the optimization procedure.

To narrow down the number of obtained RNA sequences, a subsequent step to analyze and filter the obtained solutions was almost always performed. Essentially, the differences and advantages of various solutions are explored. The generation of proper visualizations or the evaluation of additional properties that could not be incorporated into the objective function help to perform this selection process.

Finally, it is crucial to biologically test for the desired functionality of the designed molecule as many biologically relevant aspects cannot be easily included in the computational models and algorithms.

In this contribution, we aim to closely follow the described design steps to generate a simple, ligand-triggered riboswitch. Therefore, we combine the previously published RNA design software *RNAblueprint* with analysis tools like the coarse graining program *barriers* and the kinetics simulator *treekin*. To achieve our goal, we propose a functional model, specify valid constraints, and develop an objective function, which directly describes the functionality of this riboswitch at an abstract level. To compute the quality measures used by our objective, we resort to the well-established thermodynamic RNA folding model implemented in the *ViennaRNA* package. An extensive *in silico* analysis pipeline evaluates important properties of the designed sequences and thus helps to narrow down and filter the list of obtained sequences that might be sent to the laboratory for biological testing. Although we describe a work flow for the purpose of generating a *specific* riboswitch, the overall result comprises the developed protocol and software, which can easily be extended or adapted to fit novel design scenarios and thus serves as a scaffold for future tasks.

## 2. Materials and Methods

### 2.1. Specifying the design constraints

Given a model describing a desired riboswitch or functional RNA, it now needs to be converted into a machine-readable format in order to computationally generate valid sequences. Thus, the desired properties and the functionality can be expressed as a combination of constraints such as structural requirements and various properties specifying the energy landscape, and the kinetic folding properties. We specified these constraints of the functional states in the file `design_input.txt`:

```
# alternative conformation:
.....((((((((((((..... )))))))))))).....
# binding competent conformation:
((((.....((((((((.....))))))))).....)).....
# sequence constraint:
AAGUGAUACCAGCAUCGUCUUGAUGCCCUUGGCAGCACUUCA NNNNNNNNNNNNNNNNNNNNN
```

90 These sequence and structure constraints are represented in IUPACK and dot–  
bracket notation, respectively. In the sequence constraint, A, U, G and C cor-  
respond to the nucleotides adenine, uracil, guanine and cytosine, respectively.  
To positions marked with N, any nucleotide can be assigned as long as they  
are compatible to the structural constraints, where “.” represents an uncon-  
95 strained position and matching brackets “( )” two positions paired with each  
other. Please note, constraints resulting from or overlapping with the chosen  
aptamer are separated by a space that needs to be removed when constraints are  
used as input for *RNABlueprint*, the applied sequence designer. We collected  
any tools in Table 1 including a short summary, the download link, citation  
100 and further remarks. *RNABlueprint* can be invoked by executing the following  
command:

```
$ RNABlueprint -v < design_input.txt > design_output.txt
```

This returns how many compatible sequences exist ( $1.34218 \times 10^8$  for the given  
example) and, by default, ten randomly generated sequences which are written  
105 into file `design_output.txt`. In principle, each of these sequences can fold into  
both specified structures, the most stable structure typically being a hybrid.  
Please note that the obtained sequences are randomly generated and thus vary  
on every call.

## 2.2. Prediction of minimum free energy structures

110 A transcribed RNA molecule immediately forms intra-molecular base pairs,  
folding into a structural conformation known as its (secondary) structure. The  
structure, in turn, often determines the RNA’s biological function, e. g., in our  
case, the binding affinity for a given ligand. Any structure of a given RNA  
sequence can be assigned an energy value—the Gibbs free energy—and the  
115 structure expressed most likely is the one having the lowest possible energy. It  
is therefore called the minimum free energy (MFE) structure.

To predict the MFE of a given sequence and its associated secondary struc-  
ture, we use the tool *RNAfold* included in the *ViennaRNA* package (cf. Table 1).  
We first store an example sequence in a text file `exa.txt` and subsequently apply  
120 *RNAfold* to it.

```
$ echo "AAGUGAUACCAGCAUCGUCUUGAUGCCCUUGGCAGCACUUCAGUUGCUGGGGAAUGUUUUUGU" \  
> exa.txt  
$ cat exa.txt | RNAfold  
  
125 AAGUGAUACCAGCAUCGUCUUGAUGCCCUUGGCAGCACUUCAGUUGCUGGGGAAUGUUUUUGU  
.....((((((.....))))((((((((.....))))))))..... (-19.70)
```

The above invocation of *RNAfold* returns, beside the input sequence, its most  
stable structure in dot–bracket notation and the corresponding MFE. Energies  
are given in  $\text{kcal mol}^{-1}$ .

130 *2.3. Modelling ligand binding with soft constraints*

To incorporate the ability to bind to a specific ligand into an *in silico* RNA design process, a model that is aware of the stabilizing contributions of this dimerization on the resulting RNA–ligand complex is required. For the work presented here, the recently implemented soft constraint framework of the *ViennaRNA* package [16] has been applied. Among other things, it allows to add an energy bonus to structural states that exhibit a certain motif. This allows for a direct integration of the effects of ligand binding into the RNA structure prediction and evaluation process [16]. When evaluating the structure ensemble of a given molecule containing the theophylline aptamer sequence, an energy bonus of  $\Delta G = -9.22 \text{ kcal mol}^{-1}$  is added to every secondary structure that contains the correctly folded binding pocket. This value is obtained from the relation  $\Delta G = R \times T \times \ln K_d$  for the gas constant  $R = 1.987 \text{ cal mol}^{-1}$ , the temperature  $T = 310.15 \text{ K}$ , and the experimentally measured dissociation constant  $K_d = 0.32 \text{ }\mu\text{M}$  [17]. Using the example sequence and the `--motif` option of *RNAfold*,

```
145 $ cat exa.txt | RNAfold -p \
    --motif="GAUACCAG&CCCUUGGCAGC,...((((&...)))...),-9.22"

AAGUGAUACCAGCAUCGUCUUGAUGCCCUUGGCAGCACUUCAGUUGCUGGGGAAUGUUUUUGU
150 .(((...((((((.....))))))...))...))(((.....)))..... (-21.92)
,(((...((((((.....))))))...))...))|(((...})),..... [-23.32]
.(((...((((((.....))))))...))...))..(((.....)))..... {-12.20 d=4.04}
frequency of mfe structure in ensemble 0.103202; ensemble diversity 6.30
```

the MFE structure now contains the binding-competent aptamer fold with a corrected energy value (cf. first row after the sequence). As a result from using the `-p` option, a condensed representation of the base pair probabilities of each nucleotide in the ensemble with the Gibbs free energy of the soft-constrained ensemble  $G(x|s)$  (second row) as well as the centroid structure, i.e., the consensus structure of all base pairs with a probability higher than 50% in the ensemble [18], and its free energy (third row) are printed.

160 *2.4. Obtain the probability of structural features*

In a design process, one usually wishes to enforce the presence or absence of certain structural motifs, or even requires a certain sub-structure to be present with a specific probability. This calls for a method that can determine the fraction of structures of a given RNA sequence that contain a given motif. An objective function can then use this information to compute probabilities of motifs and accordingly select sequences suitable for the design goal.

*Hard constraints* of the *ViennaRNA* package are well suited for such tasks. They allow to restrict the conformations of an RNA to states containing a combination of unconstrained bases “.”, bases that have to be unpaired “x”, bases that have to be paired no matter to which binding partner “|” and base pairs indicated by matching brackets “()”. It is furthermore possible to specify if a base has to be paired with a binding partner up- or downstream by “<” and “>”, respectively. Note that structures lacking some constraints are counted

175 as well as long as no base pair conflicts with the constraint. To only include  
 structures possessing all specified base pairs, use the `--enforceConstraint`  
 option. To calculate the probability of the alternative conformation, one can  
 use the following constraint and command:

```

constraint.txt
180 AAGUGAUACCAGCAUCGUCUUGAUGCCCUUGGCAGCACUUCAGUUGCUGGGGAAUGUUUUUGU
    .....((((((((((.....)))))))))).....

$ cat constraint.txt | RNAfold -C -p \
185 --motif="GAUACCAG&CCCUUGGCAGC,(...((((&)...))...),-9.22"

AAGUGAUACCAGCAUCGUCUUGAUGCCCUUGGCAGCACUUCAGUUGCUGGGGAAUGUUUUUGU
    .....((((.....)))(.....((((.....))))))..... (-19.50)
    .....(((l...)))((((.....))))))..... [-20.19]
190 .....((((.....)))(.....((((.....))))))..... {-19.50 d=3.89}
    frequency of mfe structure in ensemble 0.32628; ensemble diversity 6.02
    
```

This performs a constrained (`-C`) partition function (`-p`) fold simulating ligand binding (`--motif`). Here, all structures of a sequence  $x$  containing only base pairs compatible to the hard constraint  $h$  and the soft constraint  $s$  are considered during the calculation. The Gibbs free energy  $G(x|h, s)$  of those structures can then be used to calculate the frequency of the constrained sub-structure within the complete ensemble, which is denoted as

$$P(x|h, s) = \exp\left(-\frac{G(x|h, s) - G(x|s)}{RT}\right). \quad (1)$$

For more background information on the relation of these energies and the probabilities, please refer to subsection 2.6. Re-running the last command without the `-C` option yields the Gibbs free energy  $G(x|s)$  without the hard constraint  $h$ . This will include all suboptimal structures in the calculation, but still uses the soft constraint option to model ligand binding (cf. subsection 2.3). For the above example,  $G(x|s)$  and  $G(x|h, s)$  are  $-23.32 \text{ kcal mol}^{-1}$  and  $-20.19 \text{ kcal mol}^{-1}$ , respectively, and the resulting probability is

$$P(x|h, s) = \exp\left(-\frac{-20.19 + 23.32}{310.15 \times 1.98717}\right) \approx 0.01.$$

195 The frequency of a structural motif in the absence of any ligand can be obtained by running both commands without the `--motif` option. Thus, we can also calculate  $P(x|h)$  as denoted in Equation 1.

### 2.5. Enumerating suboptimal structures of an RNA molecule

To analyze the *kinetics* of an RNA molecule, at least a part of its structural ensemble needs to be explicitly constructed. This is a challenging task as the number of structures even for small RNAs is enormous. The tool *RNAsubopt*  
 200 (cf. Table 1) can be applied to generate all structures a given sequence can adopt up to a given energy threshold. Consider the following example:

```
seq1.txt
AAGUGAUACCAGCAUCGUCUUGAUGCCCUUGGCAGCACUUCAGUUGUUGAGGGGGCUCAAUGAC

205 $ cat seq1.txt | RNAsubopt -e 1.2 -s

AAGUGAUACCAGCAUCGUCUUGAUGCCCUUGGCAGCACUUCAGUUGUUGAGGGGGCUCAAUGAC -21.60 1.20
.....((((((((((((((((((((.....))))))))))))))))) -21.60
....((((.....)))(((((((((((((((((((((.....))))))))))))))))) -21.50
210 (((((...((((((((((((((((((((.....)))))))))))))))))..((((((((((((((((((((.....))))))))))))))))) -21.10
((((.....((((((((((((((((((((.....)))))))))))))))))..((((((((((((((((((((.....))))))))))))))))) -20.80
..((((.....((((((((((((((((((((.....)))))))))))))))))..((((((((((((((((((((.....))))))))))))))))) -20.80
..((((.....)))(((((((((((((((((((((.....)))))))))))))))))..((((((((((((((((((((.....))))))))))))))))) -20.60
..((((.....((((((((((((((((((((.....)))))))))))))))))..((((((((((((((((((((.....))))))))))))))))) -20.50
215 ..((((.....)))(((((((((((((((((((((.....)))))))))))))))))..((((((((((((((((((((.....))))))))))))))))) -20.50
...(((.....((((((((((((((((((((.....)))))))))))))))))..((((((((((((((((((((.....))))))))))))))))) -20.40
```

where all suboptimal structures with an energy at most  $1.2 \text{ kcal mol}^{-1}$  above the MFE are generated. Note that the number of generated structures /grows egrows exponentially with both the sequence length and the size of the selected energy band. Thus, larger instances of these calculations do not only consume CPU time, but also generate files of several gigabytes in size. To reduce the number of generated sequences, it is possible to skip all structures containing *lonely base pairs*, i. e., helices of length one, by applying the `--noLP` option of *RNAsubopt*, cf. subsection 2.6.

As the sorting routine applied by *RNAsubopt* (`-s` option) might fail on huge instances even on high memory machines with giga- or even terabytes of RAM, a workaround is to pipe the *RNAsubopt* output to Unix's *sort* tool. The latter scales much better with the memory consumption of the typically huge ensemble sizes. The following example generates the full *RNAsubopt* output. The execution of this command may take some time as the *RNAsubopt* output of the example sequence is approximately 16 GB in size.

```
$ cat seq1.txt | RNAsubopt -e 22.60 | sort -k2,2n -k1,1r -S20G > seq1.sub
```

Here, the main memory buffer allocated by *sort* is set to 20 GB. Above this threshold, *sort* will dump data to temporary files on the hard drive. Assuming enough disk space is available, this still implies performance loss but makes it possible to process even huge *RNAsubopt* output. We estimated the energy band width to use for the `-e` option by folding the sequence with *RNAfold* (cf. subsection 2.2), setting its value to  $-1 \times \text{MFE} + 1$  to convert the minimum free energy (MFE) into a positive value and also take a few structures with positive energies into account. The obtained file `seq1.sub` contains a list of all possible structures within  $22.60 \text{ kcal mol}^{-1}$ , sorted by ascending energy values.

### 2.6. Assessing the impact of avoiding lonely pairs

The `--noLP` option of *RNAsubopt* (and *barriers*, cf. subsection 2.7) achieves a considerable speed-up by neglecting structures containing so-called *lonely base pairs*, i. e., base pairs which are not directly surrounded by another base pair. Put differently, this option enforces a minimal helix length of two base pairs.



The biological motivation of this optimization is that lonely base pairs usually destabilize a secondary structure and thus would open up again quickly. Structures not containing lonely pairs are called *canonical* structures.

250 Using `--noLP` significantly reduces the resources required for conducting the analysis, but may also bias its results. Therefore, when analyzing a newly designed sequence, the question arises whether applying this heuristics will, in this specific case, yield accurate results or not. Here, we derive a measure that helps to answer this question for individual sequences.

The probabilities of the secondary structures for a given RNA sequence  $x$  follow a Boltzmann distribution, i. e., the probability of a secondary structure  $\phi$  is proportional to  $B(x|\phi) := \exp(-\frac{G(x|\phi)}{RT})$ . Here,  $R$  is the universal gas constant,  $T$  is the absolute temperature, and  $G(x|\phi)$  is the Gibbs free energy of the RNA  $x$  folded into the structure  $\phi$ . The term  $B(x|\phi)$  is referred to as the *Boltzmann weight* of  $\phi$ . If  $\Phi$  is the entire structure ensemble of  $x$ , then the *partition function* of  $x$  is given by  $Z = \sum_{\phi \in \Phi} B(x|\phi)$ , and the probability of structure  $\phi$  in the ensemble is

$$P(x|\phi) = \frac{B(x|\phi)}{Z}.$$

255 Note that  $Z = B(x) := \exp(-\frac{G(x)}{RT})$ , i. e., the partition function is the Boltzmann weight of the ensemble energy  $G(x)$ .

It is reasonable to assume that leaving out extremely unlikely structures will not significantly change the results of the analysis to be performed, so one way to assess the impact of the heuristics is to enumerate structures up to a certain energy threshold and compute the fraction of structures that contain lonely pairs and will, therefore, be excluded from the simplified analysis. Furthermore, instead of simply taking the fraction of *counts* of structures with and without lonely pairs, one can get more profound results by comparing the *sums of their Boltzmann weights* corresponding to the probabilities of the respective sets of structures.

260 To achieve this for a given sequence  $x$ , first calculate the partition of the full ensemble  $Z = B(x)$  using the ensemble energy  $G(x)$  that can be computed by running `RNAfold -p`. Now, `RNAsubopt -e` can be used to enumerate structures within a given energy band above the MFE. Initialize variables  $Z^{(0)} \leftarrow 0$  and  $Z_{\text{can}}^{(0)} \leftarrow 0$ , which will be used to store the approximations of the partition functions of the full and the canonical ensemble, respectively. For the  $t$ -th output structure  $\phi$  of `RNAsubopt`, compute its Boltzmann weight  $B(x|\phi)$  and set  $Z^{(t)} \leftarrow Z^{(t-1)} + B(x|\phi)$ . Then, verify whether  $\phi$  is canonical and, if this is the case, set  $Z_{\text{can}}^{(t)} \leftarrow Z_{\text{can}}^{(t-1)} + B(x|\phi)$ , otherwise, leave it unchanged by setting  $Z_{\text{can}}^{(t)} \leftarrow Z_{\text{can}}^{(t-1)}$ . Finally, compute the fractions  $Z^{(t^*)}/Z$  and  $Z_{\text{can}}^{(t^*)}/Z$ , where  $t^*$  is the final value of  $t$ . The first fraction measures the structure coverage, i. e., which Boltzmann-weighted fraction of structures has been analyzed. It should be close to 1 for reliable results and can be improved by increasing the width of the energy band that limits the structure enumeration. The second fraction approximates the ratio of canonical structures in the ensemble.



As a side note, one might argue that, instead of the more complex enumeration process just described, one could directly compute the ensemble energy of the canonical ensemble using `RNAfold -p --noPS`. However, due to current technical limitations, the returned ensemble energy is only an upper bound of the actual value and may dramatically over-predict the fraction of canonical structures.

### 2.7. Analyzing the high-dimensional structure landscape

As the number of structures for a given RNA sequence grows exponentially with the sequence length, one cannot simulate the folding process with every single secondary structure even for small RNAs. Therefore, the number of simulation states needs to be reduced to a feasible number, ideally without biasing the outcome. This can be achieved by applying a coarse graining approach, which reduces the size of the high-dimensional structure landscape the sequence spans to a much smaller set of *macro-states*, each of which represents a set of multiple structures.

The tool *barriers* (cf. Table 1) implements a flooding algorithm that effectively coarse grains an energy landscape to macro-states or *basins*, each represented by a local minimum of the folding landscape. Each basin contains all the structures connected to its representative local minimum by the folding path of steepest descent. The tool also computes, for each two macro-states, the *barrier height*, i. e., the highest intermediate structure (with respect to its energy) that has to be overcome in order to refold from one state to the other. It can be used to visualize the RNA landscape by drawing a *barrier tree*.

*barriers* requires a list of all suboptimal structures within a certain energy range, sorted by ascending energy value, as input. How to obtain such a list is explained in subsection 2.5. To obtain correct simulation results, the energy range has to be large enough to connect all generated macro-states. If this is not the case, the width of the energy band has to be increased. Alternatively, heuristic approaches such as *findPath* [19] may be used to connect formerly disconnected states. In order to handle the huge amount of structural states generated by our design example, it is mandatory to configure *barriers* using the option `--with-hash-bits=29` and to run *make* with the argument `AM_CFLAGS=-mcmmodel=large`.

Once the input file has been generated, *barriers* can be applied to it by executing

```
$ barriers --max=500 -G RNA -M noShift --bsize --rates < seq1.sub > seq1.bar
```

The `--max=500` option specifies the number of macro-states to be generated, `-G`, specifying the graph type, is set to `RNA`, `-M noShift` disallows so-called shift moves (i. e., a move changing exactly one of the two indices of an existing base pair), and `--bsize` and `--rates` enable the output of the size of each basin, and to compute transition rates between these macro-states. The results of *barriers* are then piped into the file `seq1.bar`. A graphical representation of the barrier tree in the PostScript format is by default saved to a file named `tree.ps`, whereas the rates are stored in file `rates.out`.



```
$ perl coarsify.pl -regs coarsify_regex.txt -minh 30 seq1.bar seq1.tkin
```

coarsify.pl merges macro-states of a given barrier tree in two ways: i) if the  
370 barrier height of a state is below the selected `--minh` value, it is merged to  
its neighbor and the population density of this neighbor is increased accord-  
ingly, and ii) if states contain similar structural elements, specified as regular  
expressions (`coarsify_regex.txt`), they are merged. Note that macro-states  
375 containing a different set of these structural elements are never merged although  
i) would be applicable. In the above example, all states are merged as `--minh`  
is larger than the energy band generated by *RNAsubopt*. However, the two  
specified regular expressions combine states that are compatible with the initial  
structural constraints of the design and keep the remaining landscape separ-  
ate. The coarse-grained *barriers* and *treekin* output is written to the files  
380 `seq1_30.bar` and `seq1_30.tkin`, respectively.

### 2.10. Kinetic simulation of an RNA with ligand interaction

Analyzing the influence of a ligand on the folding kinetics of a potentially  
binding-competent RNA molecule can, in its most general form, be a difficult  
problem. Under certain conditions, however, it is possible to use *treekin* (cf.  
385 Table 1) for this task. Based on the assumption that the RNA–ligand complex  
has a rather low dissociation rate coefficient  $k_{\text{off}}$  compared to its association  
rate coefficient  $k_{\text{on}}$ , the effect of ligand addition can be simulated by declaring  
the binding-competent state *absorbing*, i. e., prevent any transitions out of it.  
This can be achieved by starting *treekin* with the population density of the last  
390 time point in `seq1.tkin`—i. e., the equilibrium distribution—and setting the `-a`  
option to the most stable binding-competent state:

```
$ grep -v "#" seq1.tkin | tail -n 1 | \  
  perl -ae '{for($i=1; $i<scalar(@F); $i++){print "--p0 $i=$F[$i] "}}' > t  
$ treekin -m I `cat t` -f rates.out --t8=1E12 -a 3 < seq1.bar > seq1_absorb.tkin  
395 $ coarsify.pl -regs coarsify_regex.txt -minh 30 seq1.bar seq1_absorb.tkin  
$ rm t
```

First, the last time point in `seq1.tkin` is extracted and converted such that the  
output saved in `t` can be used as repeated `--p0` parameter of *treekin*. Then,  
*treekin* is called and its output is stored in `seq1_absorb.tkin`, which is subse-  
400 quently coarse grained. Finally, the temporary file `t` is removed. Visualization  
of the coarse-grained absorbing landscape is possible with the graph plotting  
tool *xmgrace* (cf. Table 1) by running:

```
$ xmgrace -log x -nxy seq1_absorb_30.tkin
```

Table 1: Summary of the utilized software. RNA related software tools are either standalone or part of the *ViennaRNA* package. The installation procedure is documented on the web pages listed. Standard Unix tools are tagged as Other and are typically included in or easy to install with the package manager of any distribution.

|             | Software                                 | Description and URL                                                                                                                                                                                                                                                                                                                                                                                                                               | Ref  |
|-------------|------------------------------------------|---------------------------------------------------------------------------------------------------------------------------------------------------------------------------------------------------------------------------------------------------------------------------------------------------------------------------------------------------------------------------------------------------------------------------------------------------|------|
| RNA related | <i>RNAblueprint</i> v1.2                 | Fair sampling approach that generates sequences compatible to sequence and to one or more structural constraints. You need to install the boost library first. Note that we compiled it with <code>--disable-perl</code><br><a href="https://github.com/ViennaRNA/RNAblueprint">https://github.com/ViennaRNA/RNAblueprint</a>                                                                                                                     | [10] |
|             | <i>RNAsketch</i> v1.2                    | Python library to design nucleic acid sequences using <i>RNAblueprint</i> . It offers convenient functions to interact with the software packages of <i>ViennaRNA</i> and <i>NUPACK</i> . Furthermore, predefined methods, e.g., for sequence optimization, help to standardize the design process.<br><a href="https://github.com/ViennaRNA/RNAsketch">https://github.com/ViennaRNA/RNAsketch</a>                                                | [10] |
|             | <i>barriers</i> v1.6.0                   | Generates a coarse-grained energy landscape given an energy-sorted list of suboptimal RNA secondary structures. Note that we configured with <code>--with-hash-bits=29</code> and ran <i>make</i> with argument <code>AM_CFLAGS=-mcmmodel=large</code> in order to handle upto $2^{29}$ structures.<br><a href="http://www.tbi.univie.ac.at/RNA/Barriers/">http://www.tbi.univie.ac.at/RNA/Barriers/</a>                                          | [20] |
|             | <i>treekin</i> v0.3.1                    | Calculates folding kinetics on a coarse-grained energy landscape. One problem that often occurs during <i>treekin</i> installation is its dependency on the <i>blas</i> and <i>lapack</i> packages. Try to install them first. Note that we compiled an older version of <i>treekin</i> as v0.4.1 does not support the <code>-a</code> option.<br><a href="http://www.tbi.univie.ac.at/RNA/Treekin/">http://www.tbi.univie.ac.at/RNA/Treekin/</a> | [21] |
|             | <i>ViennaRNA</i> v2.4.0 (binary package) | Library containing the ViennaRNA tools.<br><a href="http://www.tbi.univie.ac.at/RNA/">http://www.tbi.univie.ac.at/RNA/</a>                                                                                                                                                                                                                                                                                                                        | [22] |
|             | <i>RNAfold</i>                           | Calculates minimum free energy secondary structures and partition function of nucleic acid sequences.                                                                                                                                                                                                                                                                                                                                             |      |
|             | <i>RNAsubopt</i>                         | Calculates suboptimal secondary structures a nucleic acid sequence can fold into.                                                                                                                                                                                                                                                                                                                                                                 |      |
| Other       | <i>sort</i>                              | As part of the gnu core utils this program takes a text file and sorts it in the specified order.<br><a href="http://www.gnu.org/software/coreutils/sort">http://www.gnu.org/software/coreutils/sort</a>                                                                                                                                                                                                                                          |      |
|             | <i>xmgrace</i>                           | <i>xmgrace</i> is a full-featured graphical user interface of <i>grace</i> to make two-dimensional plots.<br><a href="http://plasma-gate.weizmann.ac.il/Grace/">http://plasma-gate.weizmann.ac.il/Grace/</a>                                                                                                                                                                                                                                      |      |

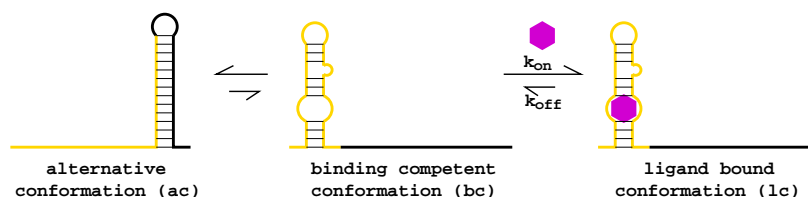

Figure 1: Graphical representation of the design idea. The system consists of two parts. In absence of the ligand, two conformations should dominate the structural ensemble. Depending on the design parameter, the **alternative conformation (ac)** should be higher populated than the **binding competent (bc)** one. Refolding rates between the two structural conformations depend on the energy barrier that separates them. Upon ligand addition, the **bc** gets trapped and the system should be shifted towards the **ligand bound conformation (lc)**.

### 3. Results

405 At the very beginning of a design process, necessary building blocks should be analyzed and evaluated to elucidate their properties. One of these blocks are RNA aptamers, as they cannot be generated by simply applying computational design methods. Here, we use an experimentally characterized RNA aptamer with known dissociation constant  $K_d$  and adaptive structural features, namely  
410 the well-known theophylline aptamer [17, 23, 24]. Alternatively, a novel aptamer could—at least in principle—be selected by performing an experimental protocol such as Systematic Evolution of Ligands by EXponential enrichment (SELEX) for the ligand of interest.

Next, a precise idea how the RNA regulation mechanism to be implemented  
415 should work is required. If it resembles a naturally occurring regulation mechanism, it is advisable to investigate its biological counterpart in detail before transferring the concept to a novel design. Figure 1 sketches the idea used to carry out the design step of this contribution. An aptamer is extended in a way that an alternative structural conformation (**ac**) is formed in absence of the ligand. As the ligand is added, it reacts with the binding-competent conformation (**bc**) to form the ligand-bound conformation (**lc**), thereby stabilizing it and sequestering the alternative conformation (**ac**).  
420

We converted this model into a sequence and two structural constraints that represent **ac** and **bc**. If its structure has been resolved, the ligand-bound conformation could be taken into account as a third structural constraint. However,  
425 upon ligand binding, aptamers typically adapt complex tertiary interactions going beyond the scope of the classical secondary structure model. In case of theophylline, extensive stacking as well as the formation of base triples during ligand recognition have been observed [23, 24]. Such interactions cannot be  
430 handled by currently available secondary structure prediction and RNA design tools. A structural constraint modelling conformation **lc** is therefore omitted.

The functional model can be expressed as a combination of constraints such as structural requirements and various properties specifying the energy landscape, and the kinetic folding properties. An RNA sequence meeting these

435 requirements as close as possible can be obtained by performing a local optimization approach. Such an approach includes i) the sampling of sequences with respect to a set of prescribed constraints, ii) the definition of a quality criterion through a proper objective function, and iii) an optimization method that decides whether to keep or reject a proposed solution.

440 We applied *RNABlueprint* to uniformly sample sequences that are compatible to the given sequence and structure constraints of the proposed design model, cf. subsection 2.1. The returned sequences need to be scored according to the design goal. Clearly, this design goal should include the evaluation of kinetic processes driving the implemented switching dynamics. However, these  
445 predictions are usually too demanding to be evaluated many times during optimization. Thus, we only use reasonable fast thermodynamic measures to ensure mandatory properties of the resulting kinetic processes [25].

On the thermodynamic level, we need to guarantee that the conformations of our model are exclusively present at least in the equilibrium. Given a sequence  $x$  and a compatible structure  $\phi$ , one can calculate the corresponding Gibbs free energy  $G(x|\phi)$  using the nearest neighbor model [26, 27]. The sequence–structure mapping is a one-to-many relation. Hence, one sequence can adapt a huge set of possible structures  $\Phi$  called this sequence’s structure ensemble. In the equilibrium, the Boltzmann weight  $B(x|\phi) := \exp(-\frac{G(x|\phi)}{RT})$  of a structure  $\phi$  is proportional to its probability. Summing over all structures of the ensemble gives rise to the partition function  $Z = \sum_{\phi \in \Phi} B(x|\phi)$  of  $x$ . From that we can calculate the probability of  $\phi$  with respect to the ensemble as

$$P(x|\phi) = \frac{B(x|\phi)}{Z}.$$

We utilize these properties to develop a novel objective function for the proposed model, cf. Figure 1. When adding the ligand to the system, we want  
450 to maximize the number of bound molecules, i. e., the probability of **1c** should ideally be one. As we do not have an explicit structural constraint of this state, we maximize the number of binding-competent structures in presence of the ligand, assuming the ligand is available in excess and immediately bound. In case of the theophylline aptamer, this precondition is fulfilled as its association  
455 rate constant  $k_{\text{on}}$  has been determined to be much higher than the dissociation rate constant  $k_{\text{off}}$  [24]. This is in accordance to its independently measured  $K_d$  of about  $0.32 \mu\text{M}$  [17]. We therefore add an energy bonus of  $-9.22 \text{ kcal mol}^{-1}$  to every secondary structure in the ensemble that contains the correctly folded—i. e., binding-competent—theophylline aptamer.

By maximizing the probability of **bc** in the presence of the ligand, we favor the conversion to the ligand-bound conformation **1c**. In contrast, **ac** should be highly populated in absence of the ligand. However, no ligand binding is possible if the RNA molecule exclusively adapts **ac** as only **bc** induces a high binding affinity of the ligand for the RNA molecule. It is therefore necessary to establish a balance between **ac** and **bc** where **bc** must always be present. We

combined all these assumptions into the novel objective function

$$f(x) = (1 - P(x | \mathbf{bc}, \text{ligand})) \cdot |a - P(x | \mathbf{ac})| \cdot |b - P(x | \mathbf{bc})| \quad (2)$$

460 where  $a, b \in (0, 1)$ ,  $a+b \leq 1$  are the target probabilities of the alternative conformation and binding-competent conformation, respectively. We set  $a = 0.7$  and  $b = 0.3$  for the discussed example. We describe the details on how to calculate the individual terms of the objective function given above utilizing the constraint framework of the *ViennaRNA* package in subsection 2.3 and subsection 2.4.

465 To perform a local optimization procedure searching for sequences optimal with respect to the derived objective function (2), we chose to harness a scripting library called *RNAsketch*, which is available as interface to the sequence sampler *RNABlueprint* (cf. Table 1). *RNAsketch* offers ready-to-use implementations of several well-known optimization strategies. To tackle the presented  
470 design problem, we implemented a *Python* script that performs adaptive walks with randomly chosen steps of varying size—ranging from point mutations to full resampling of the sequence—until the score evaluated with the designed objective function (2) stays minimal. This approach has been found to converge relatively fast towards reasonable results for other objectives [10]. Our implementation<sup>1</sup> and the corresponding commands including the inputs are available  
475 online to serve as an example of use for *RNAsketch*.

The described local optimization procedure is capable of producing many potential solutions in a relatively short amount of time. As the returned scores contain no additional information but the three probabilities, we developed an  
480 *in silico* analysis pipeline to visualize additional properties of the obtained sequences, facilitating a consecutive ranking and filtering step. First and foremost, we need to verify the kinetic properties of our obtained solutions, a usually very expensive and time-consuming task. In the following, we discuss this process for an example sequence<sup>2</sup>.

485 For a more complete picture of the energy landscape, we need to investigate the structural states our example sequence will likely fold into. We apply *RNAsubopt* to generate all suboptimal structures up to  $22.6 \text{ kcal mol}^{-1}$  above the sequence’s minimum free energy, cf. subsection 2.5. The number of possible structures grows exponentially with sequence length and is approximately 225  
490 million for the chosen energy range of  $22.6 \text{ kcal mol}^{-1}$ , resulting in a 16 GB large file. To reduce the number of generated suboptimal structures, and thereby speed up all subsequent steps, it is possible to skip all structures containing lonely pairs, i. e., helices of length one, generating only so-called canonical structures. This reduces the number of states to approximately 6.7 million, and the  
495 file size to 459 MB. However, for the shown example, this also excludes the predicted MFE structure, cf. most populated structures in the equilibrium in Figure 2. The previous ground state containing the alternative structural element is only the fourth-stable state while the MFE structure contains the

---

<sup>1</sup>`design-ligand-switch.py`

<sup>2</sup>AAGUGAUACCAGCAUCGUCUUGAUGCCCUUGGCAGCACUUCAGUUGUUGAGGGGGCCUCAAUGAC



binding-competent aptamer. Of course, this has a dramatic impact on the simulated kinetics, cf. Figure 2.

To assess the impact of the “no lonely pairs” (`--noLP`) heuristics more profoundly, the procedure described in subsection 2.6 has been applied to the example sequence. By enumerating all structures up to  $10 \text{ kcal mol}^{-1}$  above the MFE, one obtains a structure coverage of 99.9%. The identified fraction of canonical structures here is only 43%, so the vast majority of structures that would likely be encountered in the simulation are removed when applying the `--noLP` heuristics. It is clear that, in this case, the reduction to the canonical structure ensemble leads to a strong bias.

Other sequences, in contrast, have much higher fractions of canonical structures. For example, another sequence<sup>3</sup> having the same length (64 nt) and GC content (51%) as the previous example has a predominantly canonical ensemble (96% of the structures).

In any case, further coarse graining of the structure landscape is mandatory. We apply the program *barriers*, which implements a flooding algorithm and abstracts the structure landscape to a selected number of macro-states, each represented by a local minimum of the landscape (subsection 2.7). Transition rates from each of these macro-states to all other ones are then estimated and subsequently used to predict the folding kinetics.

It is possible that multiple macro-states exhibit structural features such as the structure of **bc** or the stem of **ac**. Thus, for better visualization, we merged states that exhibit certain structural features by implementing *coarsify.pl*, cf. subsection 2.9. Based on the resulting landscape and the processed transition rates, *treekin* has been invoked to simulate the single-molecule folding kinetics, cf. subsection 2.8. A visualization of the output shows the expected population density of the two designed structural states **ac** and **bc** after the equilibrium has been reached, cf. Figure 2A. This way, we verified that the estimate based on partition function folds—as used during the optimization process—matches the results of the kinetic simulation even in absence of the ligand and when the full *RNASubopt* output, including non-canonical structures, is used.

When sketching the design (cf. Figure 1), we assumed that the RNA–ligand complex has a rather low dissociation rate coefficient  $k_{\text{off}}$  compared to its association rate coefficient  $k_{\text{on}}$ . For the theophylline aptamer, this is in accordance with published rates of  $(0.07 \pm 0.02) \text{ sec}^{-1}$  and  $(1.7 \pm 0.2) \times 10^5 \text{ M}^{-1} \text{ sec}^{-1}$  at  $25 \text{ }^\circ\text{C}$  for  $k_{\text{off}}$  and  $k_{\text{on}}$ , respectively [24]. We therefore modeled the effect of ligand addition by starting *treekin* with the population density of the equilibrium and making the binding-competent state absorbing, cf. subsection 2.10. Visualization of the coarse-grained absorbing landscape shows that after about  $9 \times 10^6 \text{ AU}$ , which can be mapped to approximately 45 sec [28], 50% of the RNA molecules are in the ligand-bound state, cf. Figure 2.

---

<sup>3</sup>GUAAGAGAGGCCGCGCACAAACUUCCUACUGUUCGAAAGGUAGGAGCGUGUCAACUUACAUGG

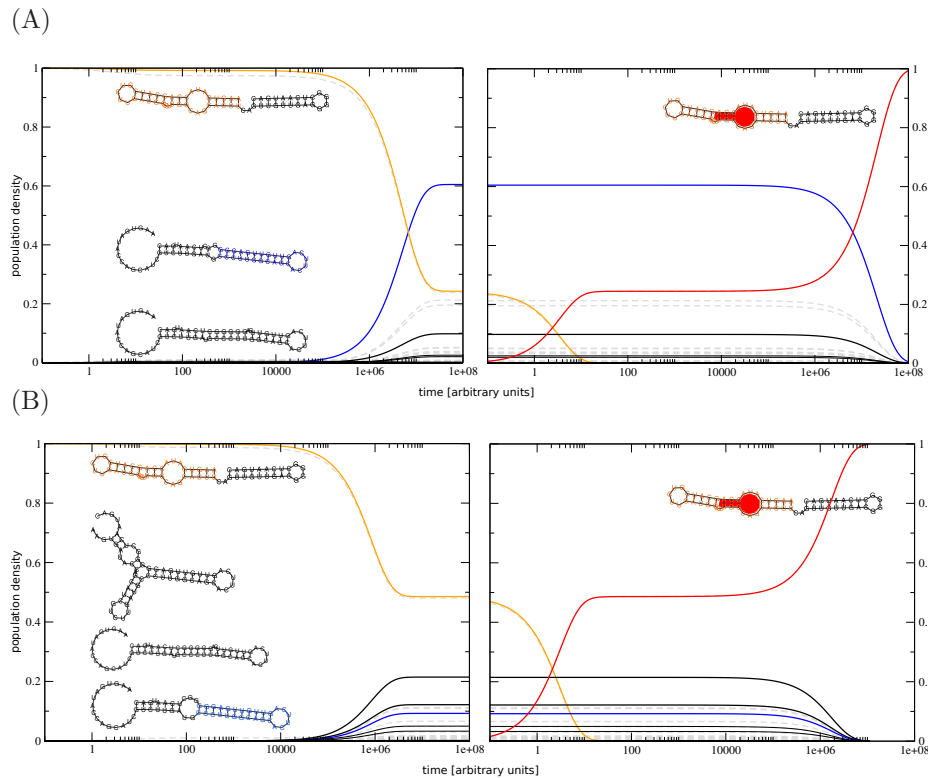

Figure 2: Simulated kinetics using (A) the complete and (B) a reduced structure ensemble by avoiding lonely pairs. In both cases, the simulation is started with the complete population in a structural state that contains the binding competent aptamer structure (orange). The left part of each plot shows the dynamics until the system is equilibrated, whereas the right part depicts the simulated systems kinetics after ligand addition. Dashed gray lines indicate the system's kinetics without coarse graining. By design, the population density in the equilibrium of all structures containing the alternative (blue) and the binding-competent (orange) structural element should be 0.7 and 0.3, respectively. Colored lines display the coarse-grained kinetics where states containing specific structural elements are merged. For most prominent states, the corresponding secondary structures of the most stable representative are shown using the same color. The blue and the thick black curves are not merged as the perfectly stacked stem of the alternative structural element was forced to be 11 nt long when adding up states.

#### 540 4. Discussion

During the development of our software pipeline, we realized that, until recently, there mainly existed two kinds of publications. One, created by wet lab researchers, focused on an experimental testing setup as well as functional and analytical tests. They frequently missed the possible advances of *in silico* 545 tools and their valuable predictive power. In contrast, publications written by researchers mainly working on computational biology often comprised sophisticated biophysical methods, great computational details, and a huge variety of mathematical and algorithmic tricks, but were frequently neglecting the aspect of biological applicability.

550 A main reason for this situation is that most of the RNA design programs available use predefined terms in the objective function as well as a fixed optimization procedure [29], and thus are inflexible and not customizable enough to be applied and adopted to the huge amount of considerably varying design scenarios. The *RNAblueprint* approach[10] decouples sampling of sequences 555 compatible to one or more structural constraints from the subsequent optimization procedure, which gives the user the full flexibility to implement novel and innovative objectives.

Computational design studies are often missing the bigger context, such as the initial analysis of the system, suggestions for experimental testing or the 560 design of proper controls. However, experimental validation is not a straightforward task and needs to be carefully planned already during the design process. This includes extensive *in vitro* or *in vivo* studies, or preferable both. To really gain knowledge about the device's mechanism and about potential mistakes or pitfalls in case of dysfunctionality, a purely qualitative answer will not be 565 enough. Therefore, a complete testing pipeline should include the determination of structures, binding affinities, or elucidate kinetic properties. Smartly designed positive and negative controls are also helpful to reveal important properties of the newly generated RNA device. Ideally, these controls will unveil quantitative answers about the mechanistic details, the actual structures 570 of the RNA or even about kinetic aspects like co-transcriptional dependency or ligand affinity.

In this contribution, we described in detail the *de novo* design of a ligand-sensing riboswitch that adapts two alternative conformations. Depending on the presence of the ligand, either a binding competent state, or a specified alternative structural conformation is dominating the ensemble. This riboswitch 575 design can easily be extended, e.g., to perform regulatory tasks in a host cell such as translational or transcriptional regulation of a downstream target gene. A translational riboswitch for instance will probably contain a Ribosome Binding Site (RBS) which is sequestered in the inactive state. This can be included 580 easily by specifying the appropriate sequence constraints and further objectives such as the accessibility of the RBS in both conformations.

For such a purpose, it is important to distinguish two types of switching behaviours. One can design riboswitches that are capable to switch on and off during the entire lifetime of the molecule. The other switches are fixed after a

585 certain time of sensing disregarding future changes in the ligand concentration.  
For the latter, switching is only possible through RNA decay and repeated  
transcription.

If switching is possible at any time, one will obtain fast response times to  
ligand changes. However, the individual states of the molecules remain fuzzy as  
590 not all of them will adapt the desired structure, leading to the observation of  
background activity. In our example, we provoked such a behavior by target-  
ing a 70:30 ratio of alternative to binding-competent conformation, and indeed  
observed a quick refolding process upon addition or removal of the ligand.

Alternatively, we could generate a “one way switch” where the state decision  
595 is only possible during a specific window. Thereafter, the chosen state is sta-  
bilized, either by a kinetic folding trap or by ongoing molecular processes such  
as translation. Once decided, individual molecules cannot revert their choice  
within reasonable time, even if the ligand dissociates or is removed from the  
system. Therefore, one must ensure that the competing states are populated  
600 during the decision window. This method has the advantage of obtaining dis-  
tinct states with very little noise. However, the response times to ligand changes  
are quite long as they depend on RNA decay and the transcription speed.

It seems to be an rather easy design model we proposed in Figure 1. How-  
ever, it is not straight forward to develop an experimental setup that is able  
605 to determine if the target ratio of 70:30 of the two conformations is reached in  
the equilibrium or not. Sophisticated approaches such as single-molecule FRET  
and NMR have been applied to determine the structure and energy landscape  
of natural riboswitches[30, 31]. Both referenced studies revealed that more than  
the presumably two dominating states are adapted depending on environmental  
610 conditions, i. e.,  $Mg^{2+}$  concentration and temperature. This might be the case  
for our designs as well although we optimized them towards two alternative  
states only. It is, furthermore, important to note that the presented *in silico*  
results are estimates. For instance the target ratio of 70:30 might be achieved  
perfectly by the optimization procedure and predicted by kinetics simulations,  
615 however, the results are extremely sensitive to the underlying energy param-  
eters. Those are measured under specific experimental conditions for rather  
short structural elements. For more complex structures, i. e., those containing  
large or even multi loops, estimates are utilized to determine a structure’s en-  
ergy [26]. If the experimental conditions vary significantly between those used to  
620 determine the energy parameters and the *in vitro* or *in vivo* testing environment  
discrepancies of prediction and measurement are an unavoidable effect.

Depending on the research question, neglecting structures with lonely pairs  
can give valuable insights into the studied system while dramatically speeding up  
the prediction process. The reason the analysis fails for the exemplary sequence  
625 presented in this work is that many of its low-energy structures contain lonely  
pairs and are therefore excluded when enabling the heuristics. The effect is  
dramatic here because even the MFE structure is not canonical.

A method to assess the importance of lonely pairs for the simulations has  
been developed and shown to correctly predict the consequences of noLP heuris-  
630 tics. In general, it is advisable to always consider the fraction of canonical base

pairs before resorting to the heuristic. Another advantage of conducting this additional analysis is that one can estimate the width of the energy band required to achieve a high coverage of the structure ensemble during the enumeration. This information is useful to improve both the performance of the simulation  
635 as well as the quality of the results even when not utilizing the noLP heuristics. Nevertheless, re-running the analysis of promising candidates with a full structure ensemble is advisable to assure correct results, if the required resources are available.

Many of the techniques used in this work implicitly make simplifying assumptions about the processes involved in RNA switching. For example, the  
640 soft constraint framework is a considerable abstraction of the binding process in at least two ways. Firstly, it models a binary binding behavior in that the ligand either perfectly fits an RNA structure and gets the full binding energy bonus, or it does not bind to the structure at all. In reality, small variations in  
645 the binding domain may lead to an altered binding energy instead. Secondly, any structure exhibiting the binding site receives the full stabilizing energy contribution, neglecting the effect of the ligand concentration and assuming infinite reaction rates. During the kinetics simulation, a similar behavior is achieved by declaring the binding-competent macro-state absorbing, i. e., the dissociation of  
650 the ligand is not possible at all.

While these may be adequate assumptions for ligands with a high binding affinity, present in an excessive concentration, it may lead to over-estimation of the fraction of RNA–ligand complexes in cases where the association rate becomes the bottleneck of the dimerization reaction. In such cases, one should  
655 resort to more sophisticated models considering these rates as well as the ligand’s concentration [32]. An efficient implementation of this approach that can readily be applied to ligand-aware cotranscriptional folding is published in this special issue [33].

When analyzing our designed switch *in silico*, we started the kinetic simulation of the ligand-free environment with all molecules in the binding-competent  
660 state. Thereby we ensured that, even in this worst scenario possible, the system quickly recovers to the defined ratio of alternative state and binding-competent state. To obtain better estimates of the switching times, starting with various other distributions depending on the application might be preferable.

In case of an *in vitro* experiment, the protocol would probably envisage to first heat up the solution to completely untangle the RNA structures and then quickly put the solution on ice until the ligand is added. A similar cooling experiment could be performed *in silico* by performing Boltzmann-weighted structure sampling from an ensemble at high temperature and using the resulting distribution of states as starting point for a subsequent kinetic simulation. In contrast,  
670 when using the generated riboswitch *in vivo*, it is likely co-transcriptionally folded within the cell. Therefore, it is advisable to obtain the initial distribution by applying a co-transcriptional folding approach, which simulates the RNA’s elongation process until the binding-competent part of the structure is fully transcribed. A software capable of this type of analysis is, for example,  
675 *BarMap* [34].

In this contribution, we aimed to generate a general ligand-triggered ribo-  
switch, which can be extended to control regulation mechanisms, such as tran-  
scriptional or translational control of a downstream target gene. We devised  
680 a functional model of such a riboswitch and successfully implemented a design  
approach to *de novo* generate RNA sequences that fulfil the prescribed prop-  
erties. The proposed pipeline consists of several modular pieces, which can be  
easily adopted or exchanged in case of varying needs. This includes the flexible  
sequence sampling engine *RNABlueprint*, a novel objective function to thermo-  
685 dynamically describe important features of the mechanism, the optimization  
approach and, finally, the *in silico* analysis pipeline to verify kinetic properties  
of the system.

## 5. Acknowledgments

This work has been supported by the European Commission under the En-  
690 vironment Theme of the 7th Framework Program for Research and Technologi-  
cal Development (Grant agreement number 323987), the Austrian science fund  
FWF project F43 “RNA regulation of the transcriptome”, the German Network  
for Bioinformatics Infrastructure (de.NBI) by the German Federal Ministry of  
Education and Research (BMBF; support code 031A538B), and by the German  
695 Research Foundation (DFG; grant STA 850/15-2)

We thank Christina Wagner for fruitful discussion and our private experi-  
mental testing help desk Mario Mörl.

## 6. Abbreviations

**UTR** untranslated region

700 **mRNA** messenger RNA

**SELEX** Systematic Evolution of Ligands by EXponential enrichment

**MFE** minimum free energy

**RBS** Ribosome Binding Site

## References

- 705 [1] R. R. Breaker, Prospects for Riboswitch Discovery and Analysis, *Molecular Cell* 43 (6) (2011) 867–879. doi:10.1016/j.molcel.2011.08.024.
- [2] C. C. Fowler, E. D. Brown, Y. Li, A FACS-based approach to engi-  
neering artificial riboswitches., *Chembiochem* 9 (12) (2008) 1906–1911.  
doi:10.1002/cbic.200700713.

- 710 [3] J. E. Weigand, M. Sanchez, E.-B. Gunnesch, S. Zeiher, R. Schroeder, B. Suess, Screening for engineered neomycin riboswitches that control translation initiation, *RNA* 14 (1) (2008) 89–97. doi:10.1261/rna.772408.
- [4] J. E. Weigand, B. Suess, Tetracycline aptamer-controlled regulation of pre-mRNA splicing in yeast, *Nucleic Acids Research* 35 (12) (2007) 4179–4185. doi:10.1093/nar/gkm425.
- 715 [5] C. Schneider, B. Suess, Identification of RNA aptamers with riboswitching properties, *Methods* doi:10.1016/j.ymeth.2015.12.001.
- [6] A. A. Green, P. A. Silver, J. J. Collins, P. Yin, Toehold Switches: De-Novo-Designed Regulators of Gene Expression, *Cell* 159 (4) (2014) 925–939. doi:10.1016/j.cell.2014.10.002.
- 720 [7] M. Etzel, M. Mörl, Synthetic Riboswitches: From Plug and Pray toward Plug and Play, *Biochemistry* 56 (9) (2017) 1181–1198. doi:10.1021/acs.biochem.6b01218.
- [8] A. Churkin, M. D. Retwitzer, V. Reinharz, Y. Ponty, J. Waldispühl, D. Barash, Design of RNAs: Comparing programs for inverse RNA folding, *Briefings in Bioinformatics* (2017) bbw120 doi:10.1093/bib/bbw120.
- 725 [9] F. J. Isaacs, D. J. Dwyer, C. Ding, D. D. Pervouchine, C. R. Cantor, J. J. Collins, Engineered riboregulators enable post-transcriptional control of gene expression, *Nature Biotechnology* 22 (7) (2004) 841–847. doi:10.1038/nbt986.
- 730 [10] S. Hammer, B. Tschitschek, C. Flamm, I. L. Hofacker, S. Findeiß, RN-Ablueprint: flexible multiple target nucleic acid sequence design, *Bioinformatics* 33 (18) (2017) 2850–2858. doi:10.1093/bioinformatics/btx263.
- [11] N. Metropolis, A. W. Rosenbluth, M. N. Rosenbluth, A. H. Teller, E. Teller, Equation of State Calculations by Fast Computing Machines, *The Journal of Chemical Physics* 21 (6) (1953) 1087–1092. doi:10.1063/1.1699114.
- 735 [12] W. K. Hastings, Monte Carlo sampling methods using Markov chains and their applications, *Biometrika* 57 (1) (1970) 97–109. doi:10.1093/biomet/57.1.97.
- 740 [13] I. L. Hofacker, W. Fontana, P. F. Stadler, L. S. Bonhoeffer, M. Tacker, P. Schuster, Fast folding and comparison of RNA secondary structures, *Monatshefte für Chemie / Chemical Monthly* 125 (2) (1994) 167–188. doi:10.1007/BF00818163.
- 745 [14] A. Taneda, Multi-objective optimization for RNA design with multiple target secondary structures, *BMC Bioinformatics* 16 (1) (2015) 280. doi:10.1186/s12859-015-0706-x.



- [15] C. Höner zu Siederdisen, S. Hammer, I. Abfalter, I. L. Hofacker, C. Flamm, P. F. Stadler, Computational design of RNAs with complex energy landscapes, *Biopolymers* 99 (12) (2013) 1124–1136. doi:10.1002/bip.22337. 750
- [16] R. Lorenz, I. L. Hofacker, P. F. Stadler, RNA folding with hard and soft constraints, *Algorithms for Molecular Biology* 11 (1). doi:10.1186/s13015-016-0070-z.
- [17] R. D. Jenison, S. C. Gill, A. Pardi, B. Polisky, High-resolution molecular discrimination by RNA, *Science* 263 (5152) (1994) 1425–1429. 755
- [18] Y. Ding, C. Y. Chan, C. E. Lawrence, Rna secondary structure prediction by centroids in a boltzmann weighted ensemble, *Rna* 11 (8) (2005) 1157–1166.
- [19] C. Flamm, I. Hofacker, Beyond energy minimization: approaches to the kinetic folding of RNA, *Chemical Monthly* 139 (2008) 447–457. 760
- [20] C. Flamm, I. L. Hofacker, P. F. Stadler, M. T. Wolfinger, Barrier trees of degenerate landscapes, *Zeitschrift für Physikalische Chemie* 216 (2/2002). doi:10.1524/zpch.2002.216.2.155.
- [21] M. T. Wolfinger, W. A. Svrcek-Seiler, C. Flamm, I. L. Hofacker, P. F. Stadler, Efficient computation of RNA folding dynamics, *Journal of Physics A: Mathematical and General* 37 (17) (2004) 4731–4741. doi:10.1088/0305-4470/37/17/005. 765
- [22] R. Lorenz, S. H. Bernhart, C. H. z. Siederdisen, H. Tafer, C. Flamm, P. F. Stadler, I. L. Hofacker, ViennaRNA Package 2.0, *Algorithms for Molecular Biology* 6 (1) (2011) 26. doi:10.1186/1748-7188-6-26. 770
- [23] G. R. Zimmermann, R. D. Jenison, C. L. Wick, J.-P. Simorre, A. Pardi, Interlocking structural motifs mediate molecular discrimination by a theophylline-binding RNA, *Nature Structural Biology* 4 (8) (1997) 644–649. doi:10.1038/nsb0897-644.
- [24] F. M. Jucker, R. M. Phillips, S. A. McCallum, A. Pardi, Role of a heterogeneous free state in the formation of a specific RNA-theophylline complex., *Biochemistry* 42 (9) (2003) 2560–2567. doi:10.1021/bi027103+. 775
- [25] S. Badelt, S. Hammer, C. Flamm, I. L. Hofacker, Chapter Eight - Thermodynamic and Kinetic Folding of Riboswitches, in: S.-J. C. Burke-Aguero, D. H. (Eds.), *Methods in Enzymology*, Vol. 553 of *Computational Methods for Understanding Riboswitches*, Academic Press, 2015, pp. 193–213. 780
- [26] D. H. Mathews, M. D. Disney, J. L. Childs, S. J. Schroeder, M. Zuker, D. H. Turner, Incorporating chemical modification constraints into a dynamic programming algorithm for prediction of RNA secondary structure., *Proc Natl Acad Sci U S A* 101 (19) (2004) 7287–7292. doi:10.1073/pnas.0401799101. 785

- [27] D. H. Turner, D. H. Mathews, NNDB: the nearest neighbor parameter database for predicting stability of nucleic acid secondary structure., *Nucleic Acids Res* 38 (Database issue) (2010) D280–D282. doi:10.1093/nar/gkp892.
- 790
- [28] B. Sauerwine, M. Widom, Folding kinetics of riboswitch transcriptional terminators and sequesterers, *Entropy* 15 (8) (2013) 3088–3099. doi:10.3390/e15083088.
- [29] S. Findeiß, M. Wachsmuth, M. Mörl, P. F. Stadler, Design of transcription regulating riboswitches, *Methods Enzymol* 550 (2015) 1–22. doi:10.1016/bs.mie.2014.10.029.
- 795
- [30] A. Reining, S. Nozinovic, K. Schlepckow, F. Buhr, B. Fürtig, H. Schwalbe, Three-state mechanism couples ligand and temperature sensing in riboswitches., *Nature* doi:10.1038/nature12378.
- [31] C. Manz, A. Y. Kobitski, A. Samanta, B. G. Keller, A. Jschke, G. U. Nienhaus, Single-molecule FRET reveals the energy landscape of the full-length SAM-i riboswitch, *Nature Chemical Biology* doi:10.1038/nchembio.2476.
- 800
- [32] F. Kühnl, P. F. Stadler, S. Will, Tractable RNA–ligand interaction kinetics, *BMC Bioinformatics* 18 (S12). doi:10.1186/s12859-017-1823-5.
- [33] M. T. Wolfinger, C. Flamm, I. L. Hofacker, Efficient computation of co-transcriptional RNA-ligand interaction dynamics, *Methods* Submitted.
- 805
- [34] I. L. Hofacker, C. Flamm, C. Heine, M. T. Wolfinger, G. Scheuermann, P. F. Stadler, BarMap: RNA folding on dynamic energy landscapes, *RNA* 16 (2010) 1308–1316.
